# Supplementary material for: A novel twelve-gene signature to evaluate neoadjuvant chemotherapy response and predict prognosis in breast cancer
Source: Research Square preprint supplement (doi:10.21203/rs.3.rs-1308081/v1), 2022-02-08

**Supplementary material 3. A**, the expression of twelve genes in tumor, normal tissues and tumor-adjacent tissues. **B**, Kaplan–Meier survival analysis of twelve genes. **C**, The calibration plots for predicting recurrence at 1, 3, and 5 years. The X-axis represents the predicted recurrence probability from the nomogram, and the y-axis represents the actual recurrence probability.


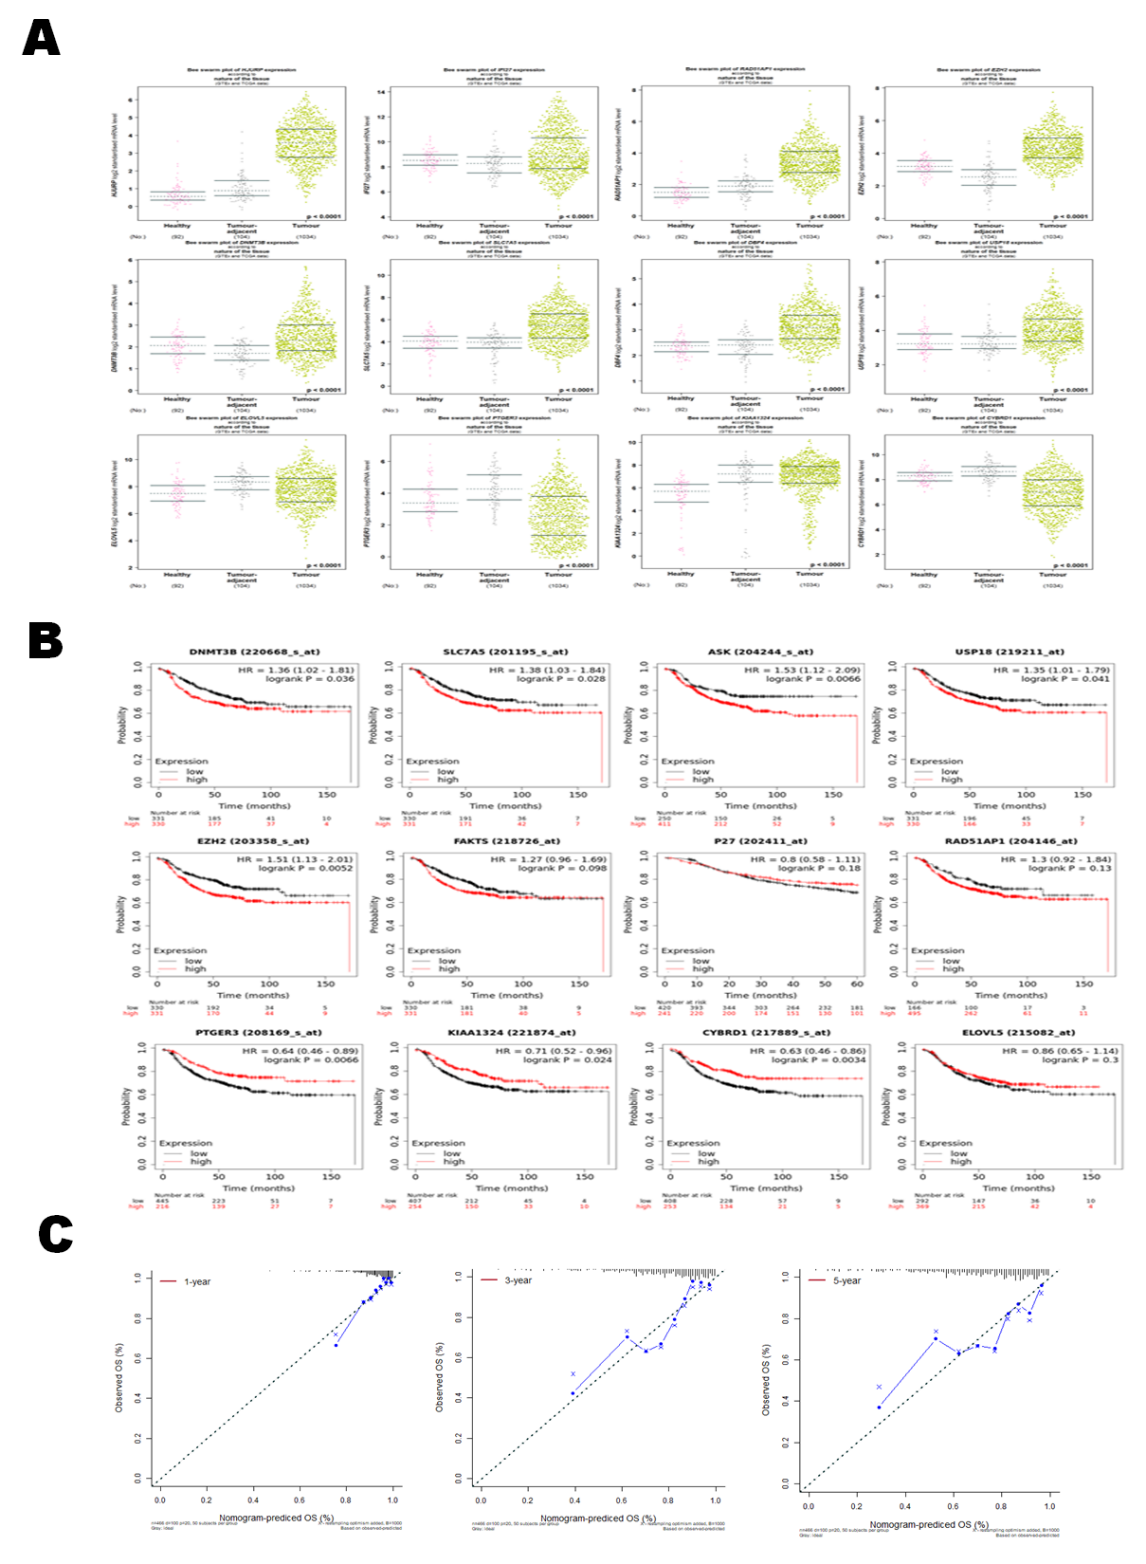

Supplement: Supplementary file 1 [file 8fcfc00c76d6072eeed8c5d9.docx]
