# Supplementary material for: A novel twelve-gene signature to evaluate neoadjuvant chemotherapy response and predict prognosis in breast cancer
Source: Research Square preprint supplement (doi:10.21203/rs.3.rs-1308081/v1), 2022-02-08
Supplement: Supplementary file 2 [file b12813cb1e4f6b9be1f5adec.docx]

**Supplementary material 1. GO analysis of the DEGs in breast cancer chemoresistance cell. A**, up/downregulated GO enrichment terms of EPI-resistant cell lines (P < 0.05). **B**, up/downregulated KEGG enrichment terms of EPI-resistant cell lines (P < 0.05). **C**, GSEA of DEGs in EPI-resistant cell lines.

**
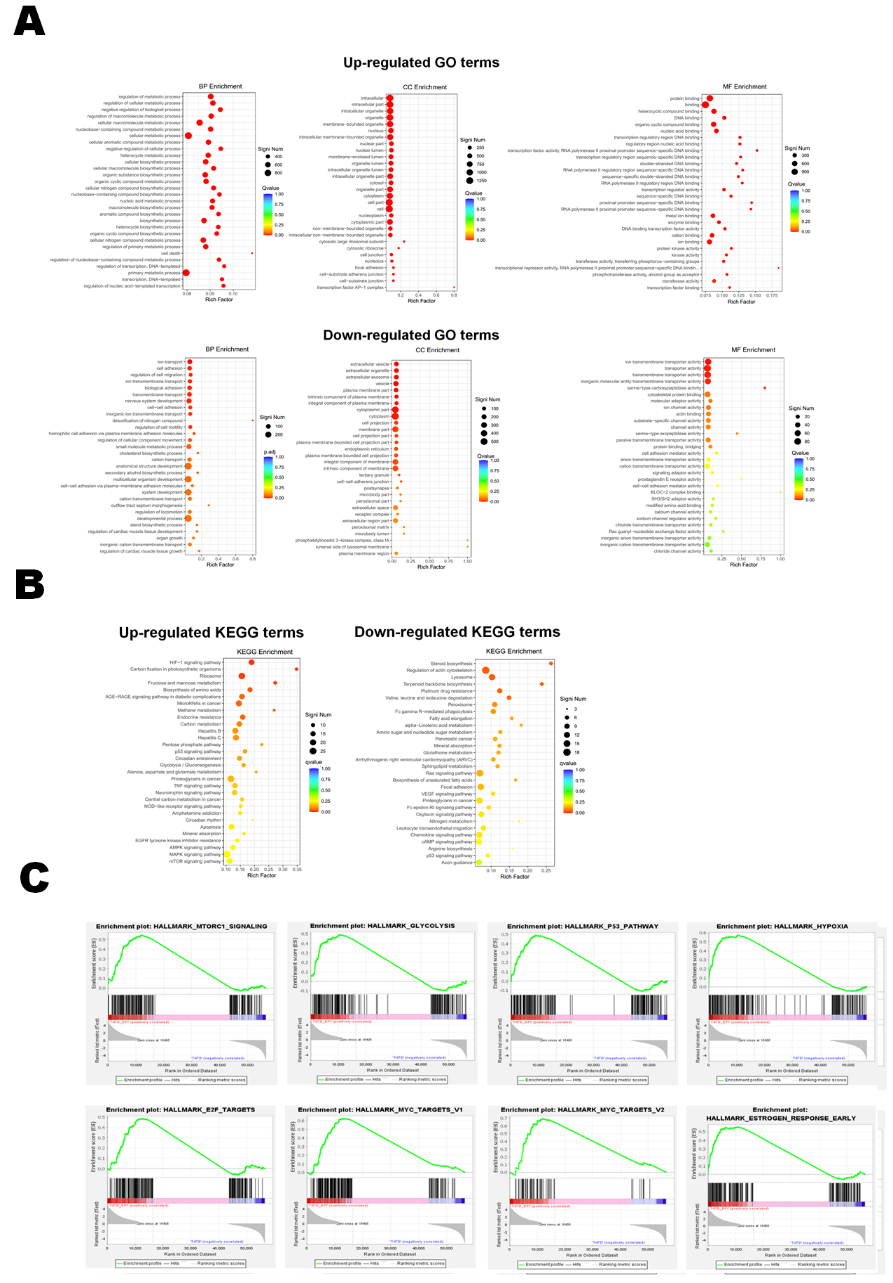
**
