# Supplementary material for: A novel twelve-gene signature to evaluate neoadjuvant chemotherapy response and predict prognosis in breast cancer
Source: Research Square preprint supplement (doi:10.21203/rs.3.rs-1308081/v1), 2022-02-08

**Supplementary material 2. Obtaining a risk model composed of the same 12 genes in the validation set.** Receiver operating characteristic (ROC) analysis of the risk score in breast cancer patients treated with neoadjuvant chemotherapy. All data are from the randomly selected as the validation set in GSE25066 dataset.


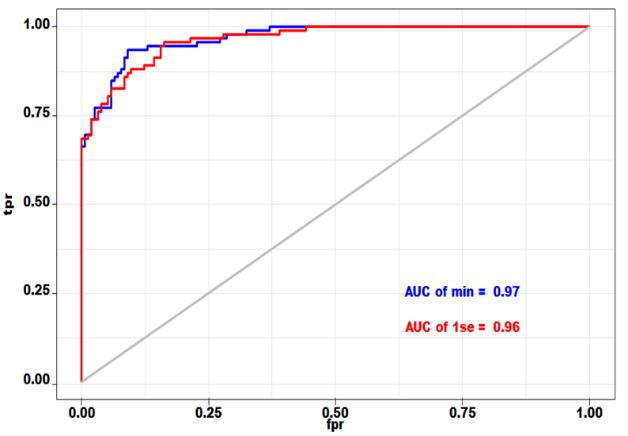

Supplement: Supplementary file 4 [file bdd3708b510944a466a3f97b.docx]
